# Supplementary material for: miR-152-3p Represses the Proliferation of the Thymic Epithelial Cells by Targeting Smad2
Source: MDPI journal article supplement (doi:10.3390/genes13040576), 2022-03-24
Supplement: s1 [file s1]

## Supplementary Figure 1

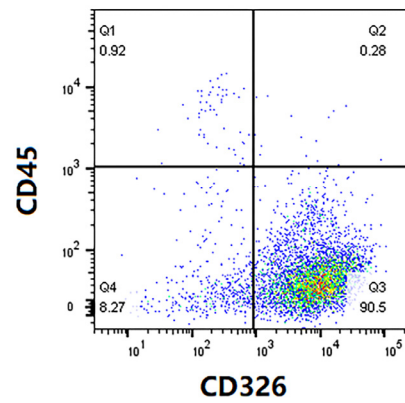

**Figure S1.** The purity of enriched TECs cells was detected by flow cytometry.

## Supplementary Figure 2

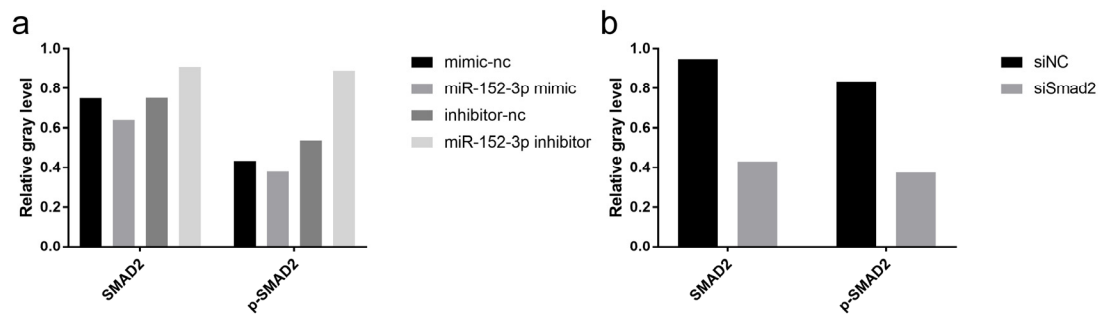

**Figure S2.** Grayscale analysis of WB bands. (a) miR-152-3p affects the expression of SMAD2 protein in MTEC1 cells. (b) Silencing Smad2 decreased the expression of SMAD2 protein.

Relative gray level = target band/ $\beta$ -actin.
